# Supplementary material
Source: publisher site journal article supplement (https://www.dovepress.com/article/353844)
Supplement: Supplementary file 1 [file get_supplementary_file.php]

**Supplementary Table 1: Evaluation of SD Biosensor RDT at Selected Hospitals in Addis Ababa, Ethiopia, 2021**

| **ID** | **Sex** | **Age** | **Antigen-RTD** | **RT_PCR** | **Date Symptom Onset** | **CT-value** | **Date**  **On Se**  **Group** |
| --- | --- | --- | --- | --- | --- | --- | --- |
| ZD001 | M | 43 | Neg | Neg | NA | >37 | NA |
| ZD002 | M | 65 | Neg | Neg | NA | >37 | NA |
| ZD003 | M | 67 | Neg | Neg | NA | >37 | NA |
| ZD004 | M | 64 | Neg | Neg | NA | >37 | NA |
| ZD005 | M | 25 | Neg | Neg | NA | >37 | NA |
| ZD006 | M | 57 | Neg | Neg | NA | >37 | NA |
| ZD007 | F | 39 | Neg | Neg | NA | >37 | NA |
| ZD008 | F | 50 | Neg | Neg | NA | >37 | NA |
| ZD009 | F | 20 | Neg | Neg | NA | >37 | NA |
| ZD010 | F | 26 | Neg | Neg | NA | >37 | NA |
| ZD011 | M | 28 | Neg | Neg | NA | >37 | NA |
| ZD012 | M | 65 | Neg | Neg | NA | >37 | NA |
| ZD013 | F | 48 | Neg | Neg | NA | >37 | NA |
| ZD014 | F | 50 | Neg | Neg | NA | >37 | NA |
| ZD015 | F | 27 | Neg | Neg | NA | >37 | NA |
| ZD016 | F | 39 | Neg | Neg | NA | >37 | NA |
| ZD017 | F | 54 | Neg | Neg | NA | >37 | NA |
| ZD018 | M | 19 | Neg | Neg | NA | >37 | NA |
| ZD019 | M | 43 | Neg | Neg | NA | >37 | NA |
| ZD020 | M | 24 | Neg | Neg | NA | >37 | NA |
| ZD021 | F | 46 | Neg | Neg | NA | >37 | NA |
| ZD022 | M | 65 | Pos | Neg | NA | >37 | NA |
| ZD023 | F | 14 | Neg | Neg | NA | >37 | NA |
| ZD024 | M | 27 | Neg | Neg | NA | >37 | NA |
| ZD025 | F | 31 | Neg | Neg | NA | >37 | NA |
| ZD026 | F | 21 | Neg | Neg | NA | >37 | NA |
| ZD027 | F | 43 | Neg | Neg | NA | >37 | NA |
| ZD028 | M | 66 | Neg | Neg | NA | >37 | NA |
| ZD029 | M | 51 | Neg | Neg | NA | >37 | NA |
| ZD030 | F | 21 | Neg | Neg | NA | >37 | NA |
| ZD031 | F | 30 | Neg | Neg | NA | >37 | NA |
| ZD032 | F | 31 | Neg | Neg | NA | >37 | NA |
| ZD033 | F | 75 | Neg | Neg | NA | >37 | NA |
| ZD034 | F | 16 | Neg | Neg | NA | >37 | NA |
| ZD035 | M | 60 | Neg | Neg | NA | >37 | NA |
| ZD036 | F | 69 | Neg | Neg | NA | >37 | NA |
| ZD037 | F | 35 | Neg | Neg | NA | >37 | NA |
| ZD038 | M | 28 | Neg | Neg | NA | >37 | NA |
| ZD039 | F | 42 | Neg | Neg | NA | >37 | NA |
| ZD040 | F | 50 | Pos | Neg | NA | >37 | NA |
| ZD041 | M | 28 | Neg | Neg | NA | >37 | NA |
| ZD042 | F | 30 | Neg | Neg | NA | >37 | NA |
| ZD043 | M | 51 | Neg | Neg | NA | >37 | NA |
| ZD044 | F | 18 | Neg | Neg | NA | >37 | NA |
| ZD045 | M | 25 | Neg | Neg | NA | >37 | NA |
| ZD046 | F | 47 | Neg | Neg | NA | >37 | NA |
| ZD047 | M | 60 | Neg | Neg | NA | >37 | NA |
| ZD048 | M | 26 | Neg | Neg | NA | >37 | NA |
| ZD049 | M | 25 | Neg | Neg | NA | >37 | NA |
| ZD050 | M | 45 | Neg | Neg | NA | >37 | NA |
| ZD051 | F | 40 | Neg | Neg | NA | >37 | NA |
| ZD052 | F | 29 | Neg | Neg | NA | >37 | NA |
| ZD053 | F | 26 | Neg | Neg | NA | >37 | NA |
| ZD054 | M | 37 | Neg | Neg | NA | >37 | NA |
| ZD055 | M | 12 | Neg | Neg | NA | >37 | NA |
| ZD056 | F | 26 | Neg | Neg | NA | >37 | NA |
| ZD057 | M | 56 | Neg | Neg | NA | >37 | NA |
| ZD058 | M | 53 | Neg | Neg | NA | >37 | NA |
| ZD059 | M | 60 | Neg | Neg | NA | >37 | NA |
| ZD060 | F | 43 | Neg | Neg | NA | >37 | NA |
| ZD061 | F | 44 | Neg | Neg | NA | >37 | NA |
| ZD062 | F | 42 | Neg | Neg | NA | >37 | NA |
| ZD063 | M | 30 | Neg | Neg | NA | >37 | NA |
| ZD064 | M | 40 | Neg | Neg | NA | >37 | NA |
| ZD065 | M | 44 | Neg | Neg | NA | >37 | NA |
| ZD066 | F | 43 | Neg | Neg | NA | >37 | NA |
| ZD067 | M | 31 | Neg | Neg | NA | >37 | NA |
| ZD068 | F | 31 | Neg | Neg | NA | >37 | NA |
| ZD069 | M | 42 | Neg | Neg | NA | >37 | NA |
| ZD070 | M | 67 | Neg | Neg | NA | >37 | NA |
| ZD071 | M | 75 | Neg | Neg | NA | >37 | NA |
| ZD072 | F | 28 | Neg | Neg | NA | >37 | NA |
| ZD073 | F | 20 | Neg | Neg | NA | >37 | NA |
| ZD074 | F | 51 | Neg | Neg | NA | >37 | NA |
| ZD075 | F | 37 | Neg | Neg | NA | >37 | NA |
| ZD076 | M | 50 | Neg | Neg | NA | >37 | NA |
| ZD077 | F | 30 | Neg | Neg | NA | >37 | NA |
| ZD078 | M | 57 | Neg | Neg | NA | >37 | NA |
| ZD079 | M | 20 | Neg | Neg | NA | >37 | NA |
| ZD080 | F | 33 | Neg | Neg | NA | >37 | NA |
| ZD081 | M | 43 | Neg | Neg | NA | >37 | NA |
| ZD082 | M | 59 | Neg | Neg | NA | >37 | NA |
| ZD083 | F | 60 | Neg | Neg | NA | >37 | NA |
| ZD084 | M | 37 | Neg | Neg | NA | >37 | NA |
| ZD085 | F | 45 | Neg | Neg | NA | >37 | NA |
| ZD086 | M | 42 | Neg | Neg | NA | >37 | NA |
| ZD087 | F | 41 | Neg | Neg | NA | >37 | NA |
| ZD088 | M | 48 | Neg | Neg | NA | >37 | NA |
| ZD089 | F | 74 | Neg | Neg | NA | >37 | NA |
| ZD090 | M | 51 | Neg | Neg | NA | >37 | NA |
| ZD091 | F | 16 | Neg | Neg | NA | >37 | NA |
| ZD092 | M | 39 | Neg | Neg | NA | >37 | NA |
| ZD093 | M | 32 | Neg | Neg | NA | >37 | NA |
| ZD094 | M | 70 | Pos | Neg | NA | >37 | NA |
| ZD095 | M | 61 | Neg | Neg | NA | >37 | NA |
| ZD096 | F | 55 | Neg | Neg | NA | >37 | NA |
| ZD097 | F | 30 | Neg | Neg | NA | >37 | NA |
| ZD098 | F | 39 | Neg | Neg | NA | >37 | NA |
| ZD099 | M | 64 | Neg | Neg | NA | >37 | NA |
| ZD100 | F | 50 | Neg | Neg | NA | >37 | NA |
| ZD101 | M | 31 | Neg | Pos | 2 | <25 | <7 |
| ZD102 | M | 78 | Neg | Pos | 2 | <25 | <7 |
| ZD103 | M | 78 | Pos | Pos | 2 | <25 | <7 |
| ZD104 | M | 65 | Pos | Pos | 2 | <25 | <7 |
| ZD105 | M | 53 | Pos | Pos | 6 | <25 | <7 |
| ZD106 | F | 55 | Pos | Neg | 6 | <25 | <7 |
| ZD107 | M | 65 | Pos | Pos | 4 | <25 | <7 |
| ZD108 | F | 49 | Pos | Pos | 8 | 25-30 | >=7 |
| ZD109 | M | 50 | Pos | Pos | 2 | <25 | <7 |
| ZD110 | F | 47 | Pos | Pos | 1 | <25 | <7 |
| ZD111 | M | 56 | Pos | Pos | 3 | <25 | <7 |
| ZD112 | M | 55 | Pos | Pos | 5 | <25 | <7 |
| ZD113 | M | 60 | Pos | Pos | 3 | <25 | <7 |
| ZD114 | M | 64 | Pos | Pos | 8 | 25-30 | >=7 |
| ZD115 | F | 50 | Pos | Pos | 4 | <25 | <7 |
| ZD116 | M | 52 | Pos | Pos | 1 | <25 | <7 |
| ZD117 | M | 90 | Pos | Pos | 6 | <25 | <7 |
| ZD118 | M | 63 | Pos | Pos | 6 | <25 | <7 |
| ZD119 | M | 63 | Pos | Pos | 3 | 25-30 | <7 |
| ZD120 | M | 49 | Pos | Pos | 4 | 25-30 | <7 |
| ZD121 | F | 92 | Pos | Pos | 2 | <25 | <7 |
| ZD122 | F | 44 | Pos | Pos | 4 | <25 | <7 |
| ZD123 | M | 76 | Pos | Pos | 1 | <25 | <7 |
| ZD124 | F | 46 | Pos | Pos | 3 | <25 | <7 |
| ZD125 | M | 48 | Pos | Pos | 4 | <25 | <7 |
| ZD126 | M | 53 | Pos | Pos | 4 | <25 | <7 |
| ZD127 | M | 65 | Pos | Pos | 5 | <25 | <7 |
| ZD128 | M | 51 | Pos | Pos | 3 | <25 | <7 |
| ZD129 | F | 42 | Pos | Pos | 8 | 25-30 | >=7 |
| ZD130 | M | 48 | Pos | Pos | 1 | <25 | <7 |
| ZD131 | F | 70 | Pos | Pos | 6 | <25 | <7 |
| ZD132 | M | 45 | Pos | Pos | 1 | <25 | <7 |
| ZD133 | M | 35 | Pos | Pos | 6 | <25 | <7 |
| ZD134 | M | 35 | Pos | Pos | 4 | <25 | <7 |
| ZD135 | M | 52 | Pos | Pos | 5 | 30-36 | <7 |
| ZD136 | M | 98 | Pos | Pos | 11 | 25-30 | >=7 |
| ZD137 | M | 50 | Pos | Pos | 2 | <25 | <7 |
| ZD138 | M | 43 | Pos | Pos | 4 | <25 | <7 |
| ZD139 | F | 48 | Pos | Pos | 4 | <25 | <7 |
| ZD140 | F | 49 | Pos | Pos | 8 | <25 | >=7 |
| ZD141 | F | 43 | Pos | Pos | 4 | <25 | <7 |
| ZD142 | F | 51 | Pos | Pos | 8 | 30-36 | >=7 |
| ZD143 | M | 50 | Pos | Pos | 2 | <25 | <7 |
| ZD144 | F | 70 | Pos | Pos | 2 | <25 | <7 |
| ZD145 | M | 60 | Pos | Pos | 3 | <25 | <7 |
| ZD146 | M | 28 | Pos | Pos | 4 | <25 | <7 |
| ZD147 | F | 60 | Pos | Pos | 12 | 30-36 | >=7 |
| ZD148 | F | 48 | Pos | Pos | 12 | 25-30 | >=7 |
| ZD149 | F | 42 | Pos | Pos | 8 | 30-36 | >=7 |
| ZD150 | M | 40 | Pos | Pos | 6 | 25-30 | <7 |
| ZD151 | F | 45 | Pos | Pos | 8 | 25-30 | >=7 |
| ZD152 | F | 47 | Pos | Pos | 3 | 25-30 | <7 |
| ZD153 | F | 65 | Pos | Pos | 2 | <25 | <7 |
| ZD154 | F | 80 | Pos | Pos | 5 | <25 | <7 |
| ZD155 | F | 50 | Pos | Pos | 3 | <25 | <7 |
| ZD156 | F | 80 | Pos | Pos | 6 | <25 | <7 |
| ZD157 | M | 50 | Pos | Pos | 2 | <25 | <7 |
| ZD158 | M | 35 | Pos | Pos | 2 | <25 | <7 |
| ZD159 | F | 41 | Pos | Pos | 4 | <25 | <7 |
| ZD160 | M | 49 | Pos | Pos | 4 | <25 | <7 |
| ZD161 | F | 31 | Pos | Pos | 2 | <25 | <7 |
| ZD162 | F | 43 | Pos | Pos | 1 | <25 | <7 |
| ZD163 | F | 55 | Pos | Pos | 11 | 30-36 | >=7 |
| ZD164 | F | 28 | Pos | Pos | 4 | <25 | <7 |
| ZD165 | F | 55 | Pos | Pos | 4 | <25 | <7 |
| ZD166 | F | 20 | Pos | Pos | 9 | 25-30 | >=7 |
| ZD167 | F | 44 | Pos | Pos | 4 | <25 | <7 |
| ZD168 | M | 48 | Pos | Pos | 8 | 25-30 | >=7 |
| ZD169 | F | 75 | Pos | Pos | 8 | 25-30 | >=7 |
| ZD170 | M | 27 | Pos | Pos | 10 | 25-30 | >=7 |
| ZD171 | M | 45 | Pos | Pos | 4 | <25 | <7 |
| ZD172 | M | 80 | Pos | Pos | 11 | 25-30 | >=7 |
| ZD173 | F | 57 | Pos | Pos | 8 | 25-30 | >=7 |
| ZD174 | F | 65 | Pos | Pos | 6 | <25 | <7 |
| ZD175 | M | 40 | Pos | Pos | 13 | 30-36 | >=7 |
| ZD176 | F | 75 | Pos | Pos | 4 | <25 | <7 |
| ZD177 | M | 35 | Pos | Pos | 1 | <25 | <7 |
| ZD178 | F | 51 | Pos | Pos | 2 | <25 | <7 |
| ZD179 | F | 32 | Pos | Pos | 3 | <25 | <7 |
| ZD180 | M | 46 | Pos | Pos | 3 | <25 | <7 |
| ZD181 | M | 35 | Pos | Pos | 17 | 30-36 | >=7 |
| ZD182 | M | 18 | Pos | Pos | 18 | 30-36 | >=7 |
| ZD183 | M | 50 | Pos | Pos | 6 | 25-30 | <7 |
| ZD184 | M | 42 | Pos | Pos | 4 | <25 | <7 |
| ZD185 | M | 46 | Pos | Pos | 9 | 25-30 | >=7 |
| ZD186 | F | 28 | Pos | Pos | 17 | 25-30 | >=7 |
| ZD187 | M | 47 | Pos | Pos | 6 | 30-36 | <7 |
| ZD188 | M | 21 | Pos | Pos | 10 | 25-30 | >=7 |
| ZD189 | M | 50 | Pos | Pos | 15 | 25-30 | >=7 |
| ZD190 | M | 28 | Pos | Pos | 15 | 25-30 | >=7 |
| ZD191 | M | 32 | Pos | Pos | 15 | 25-30 | >=7 |
| ZD192 | M | 49 | Pos | Pos | 6 | <25 | <7 |
| ZD193 | M | 42 | Pos | Pos | 3 | <25 | <7 |
| ZD194 | M | 52 | Pos | Pos | 16 | 25-30 | >=7 |
| ZD195 | M | 40 | Pos | Pos | 17 | 25-30 | >=7 |
| ZD196 | M | 35 | Pos | Pos | 15 | 25-30 | >=7 |
| ZD197 | M | 51 | Neg | Pos | 17 | 30-36 | >=7 |
| ZD198 | M | 36 | Pos | Pos | 17 | 30-36 | >=7 |
| ZD199 | M | 37 | Neg | Pos | 16 | 30-36 | >=7 |
| ZD200 | M | 25 | Neg | Pos | 16 | 30-36 | >=7 |

**Abbreviations**: Neg: Negative; Pos: Positive, M: Male; F: Female; NA: Non-Applicable; RDT, Rapid diagnostic test
